# Supplementary material
Source: MDPI journal article supplement (https://www.mdpi.com/2311-7524/10/3/234)
Supplement: s1 [file s1]

Table S1 Temperature changes of four formulations (FCK, FT1, FT2 and FT3) at different fermentation stages (C0,C1,C2,C3 and C4)

| Substrate | C0       | C1       | C2       | C3       | C4       |
|-----------|----------|----------|----------|----------|----------|
| FCK       | 33±0.00a | 60±0.20d | 55±0.10d | 53±0.16d | 52±0.00c |
| FT1       | 33±0.00a | 73±0.16a | 59±0.10b | 57±0.00b | 53±0.10b |
| FT2       | 33±0.00a | 70±0.20b | 56±0.16c | 63±0.16a | 60±0.10a |
| FT3       | 33±0.00a | 66±0.10c | 65±0.16a | 56±0.00c | 60±0.20a |

#Different lowercase letters denote significant differences in each column ( $P < 0.05$ ).

Table S2 pH changes of four formulations at different fermentation stages

| Substrate | C0         | C1         | C2         | C3         | C4         |
|-----------|------------|------------|------------|------------|------------|
| FCK       | 5.99±0.00a | 7.40±0.01c | 8.01±0.01d | 7.75±0.02d | 5.89±0.01b |
| FT1       | 5.92±0.02b | 7.29±0.01d | 8.31±0.01c | 8.22±0.02b | 5.85±0.01c |
| FT2       | 5.85±0.01c | 7.60±0.01b | 8.37±0.01b | 8.12±0.01c | 5.93±0.01a |
| FT3       | 5.60±0.01d | 7.87±0.01a | 8.46±0.01a | 8.52±0.01a | 5.76±0.00d |

#Different lowercase letters denote significant differences in each column ( $P < 0.05$ ).

Table S3 Total carbon content changes at different fermentation stages

| Substrate | C0           | C1           | C2           | C3           | C4           |
|-----------|--------------|--------------|--------------|--------------|--------------|
| FCK       | 43.38±0.03 a | 43.72±0.01 a | 43.83±0.06 a | 43.76±0.05 a | 43.26±0.05 a |
| FT1       | 38.61±0.19 b | 39.12±0.07 b | 40.26±0.18 b | 39.76±0.10 b | 40.24±0.06 b |
| FT2       | 36.78±0.44 c | 36.85±0.42 c | 37.41±0.36 c | 36.92±0.11 c | 38.29±0.25 c |
| FT3       | 33.72±0.06 d | 34.14±0.41 d | 32.90±0.14 d | 31.34±0.06 d | 34.77±0.10 d |

#Different lowercase letters denote significant differences in each column ( $P < 0.05$ ).

Table S4 Total nitrogen content changes at different fermentation stages

| Substrate | C0          | C1           | C2          | C3          | C4          |
|-----------|-------------|--------------|-------------|-------------|-------------|
| FCK       | 2.37±0.02 b | 2.28±0.02 b  | 2.31±0.01 b | 2.25±0.01 b | 2.47±0.03 c |
| FT1       | 2.66±0.03 a | 2.51±0.04 a  | 2.54±0.04 a | 2.49±0.02 a | 2.60±0.00 a |
| FT2       | 2.39±0.04 b | 2.25±0.05 bc | 2.35±0.03 b | 2.5±0.01 a  | 2.54±0.01 b |
| FT3       | 2.23±0.02 c | 2.2±0.02 c   | 2.19±0.03 c | 2.25±0.02 b | 2.37±0.01 d |

#Different lowercase letters denote significant differences in each column ( $P < 0.05$ ).

Table S5 C:N ratio changes at different fermentation stages

| Substrate | C0           | C1           | C2           | C3           | C4           |
|-----------|--------------|--------------|--------------|--------------|--------------|
| FCK       | 18.31±0.14 a | 19.21±0.11 a | 19.01±0.1 a  | 19.47±0.06 a | 17.5±0.22 a  |
| FT1       | 14.53±0.09 d | 15.61±0.24 c | 15.84±0.33 b | 15.99±0.13 b | 15.49±0.05 b |
| FT2       | 15.36±0.02 b | 16.41±0.15 b | 15.9±0.03 b  | 14.79±0.03 c | 15.11±0.06 c |
| FT3       | 15.11±0.06 c | 15.51±0.06 c | 15.03±0.14 c | 13.95±0.09 d | 14.66±0.08 d |

#Different lowercase letters denote significant differences in each column ( $P < 0.05$ ).

Table S6 Nutritional value of *A. aegerita* when cultivated on different substrates

| Substrate | Proteing/100g | Fat g/100g | Ash content g/100g | Crude polysaccharide g/100g | Crude fibre g/100g |
|-----------|---------------|------------|--------------------|-----------------------------|--------------------|
|-----------|---------------|------------|--------------------|-----------------------------|--------------------|

|     |             |            |            |             |            |
|-----|-------------|------------|------------|-------------|------------|
| ck  | 25.45±0.35f | 3.55±0.05a | 7.30±0.00d | 3.97±0.02e  | 9.15±0.05a |
| T1  | 27.35±0.25d | 3.15±0.05d | 7.80±0.00a | 4.31±0.08c  | 9.10±0.10a |
| T2  | 29.05±0.05b | 3.34±0.01c | 7.80±0.00a | 3.90±0.02f  | 7.75±0.05f |
| T3  | 28.30±0.30c | 3.00±0.00e | 7.30±0.00d | 4.39±0.03b  | 8.20±0.00e |
| FCK | 25.40±0.20f | 3.60±0.00a | 7.70±0.00b | 4.25±0.04c  | 8.95±0.05b |
| FT1 | 27.35±0.05d | 3.20±0.00d | 7.65±0.05c | 4.10±0.03d  | 8.80±0.00c |
| FT2 | 26.60±0.10e | 3.45±0.05b | 7.20±0.00e | 4.46±0.03a  | 8.45±0.05d |
| FT3 | 29.60±0.20a | 3.30±0.00c | 7.30±0.00d | 3.96±0.02ef | 8.45±0.05d |

---

<sup>#</sup>Different lowercase letters denote significant differences in each column ( $P < 0.05$ ).
